# Supplementary material for: Incarceration of Youths in an Adult Correctional Facility and Risk of Premature Death
Source: PubMed Central journal article supplement (PMC10323704; doi:10.1001/jamanetworkopen.2023.21805), 2023-07-05
Supplement: jamanetwopen-e2321805-s002.pdf [file jamanetwopen-e2321805-s002.pdf]

## Data Sharing Statement

Silver. Incarceration of Youths in an Adult Correctional Facility and Risk of Premature Death. *JAMA Netw Open*. Published July 05, 2023. doi:10.1001/jamanetworkopen.2023.21805

### Data

**Data available:** Yes

**Data types:** Deidentified participant data

**How to access data:** <https://www.nlsinfo.org/investigator/pages/search?s=NLSY97#>

**When available:** beginning date: 01-01-2013, end date: 12-31-2033

### Supporting Documents

**Document types:** Statistical/analytic code

**How to access documents:** Submitted alongside the manuscript.

**When available:** With publication

### Additional Information

**Who can access the data:** Anyone

**Types of analyses:** Every Analysis

**Mechanisms of data availability:** Without investigator support

**Any additional restrictions:** None
